# Supplementary material
Source: publisher figshare collection journal article supplement (https://geolsoc.figshare.com/articles/dataset/_/3454094)

Weighted mean of all steps                      **183.70**                      **4.20**

Weighted mean excluding first four and last steps                      **183.80**                      **1.80**

| <b>W15</b> | <b><sup>40</sup>Ar/<sup>39</sup>Ar</b> | <b><sup>38</sup>Ar/<sup>39</sup>Ar</b> | <b><sup>37</sup>Ar/<sup>39</sup>Ar</b> | <b><sup>36</sup>Ar/<sup>39</sup>Ar</b> | <b><sup>39</sup>Ar %</b> | <b>Age (Ma)</b> | <b>+-</b> |
|------------|----------------------------------------|----------------------------------------|----------------------------------------|----------------------------------------|--------------------------|-----------------|-----------|
| step 1     | 80.557                                 | 0.0573                                 | 1.738                                  | 0.1870                                 | 6.6                      | 477.51          | 5.68      |
| step 2     | 15.948                                 | 0.0155                                 | 2.074                                  | 0.0262                                 | 13.7                     | 169.35          | 3.72      |
| step 3     | 12.489                                 | 0.0147                                 | 1.954                                  | 0.0171                                 | 18.9                     | 153.72          | 5.11      |
| step 4     | 12.670                                 | 0.0159                                 | 2.158                                  | 0.0169                                 | 23.6                     | 158.54          | 5.36      |
| step 5     | 12.910                                 | 0.0161                                 | 2.097                                  | 0.0157                                 | 28.8                     | 170.68          | 4.91      |
| step 6     | 13.094                                 | 0.0203                                 | 2.053                                  | 0.0142                                 | 35.0                     | 182.48          | 4.11      |
| step 7     | 15.853                                 | 0.0244                                 | 1.732                                  | 0.0225                                 | 38.5                     | 188.86          | 7.14      |
| step 8     | 14.641                                 | 0.0163                                 | 1.765                                  | 0.0197                                 | 41.9                     | 181.34          | 7.34      |
| step 9     | 14.378                                 | 0.0216                                 | 1.619                                  | 0.0186                                 | 43.9                     | 182.61          | 12.73     |
| step 10    | 16.491                                 | 0.0215                                 | 2.050                                  | 0.0256                                 | 47.2                     | 183.20          | 7.49      |
| step 11    | 16.409                                 | 0.0155                                 | 2.120                                  | 0.0244                                 | 52.0                     | 188.87          | 5.34      |
| step 12    | 16.285                                 | 0.0172                                 | 2.443                                  | 0.0257                                 | 59.4                     | 178.53          | 3.46      |
| step 13    | 14.478                                 | 0.0149                                 | 2.556                                  | 0.0189                                 | 75.0                     | 182.87          | 3.25      |
| step 14    | 13.533                                 | 0.0136                                 | 2.808                                  | 0.0160                                 | 88.8                     | 180.88          | 3.66      |
| step 15    | 13.347                                 | 0.0145                                 | 2.917                                  | 0.0151                                 | 95.8                     | 182.71          | 6.90      |
| step 16    | 12.952                                 | 0.0112                                 | 2.920                                  | 0.0138                                 | 99.1                     | 182.53          | 14.83     |
| step 17    | 26.114                                 | 0.0141                                 | 3.167                                  | 0.0773                                 | 100.0                    | 69.34           | 53.50     |
|            |                                        |                                        |                                        |                                        | Plateau Age              | 182.30          | 1.50      |

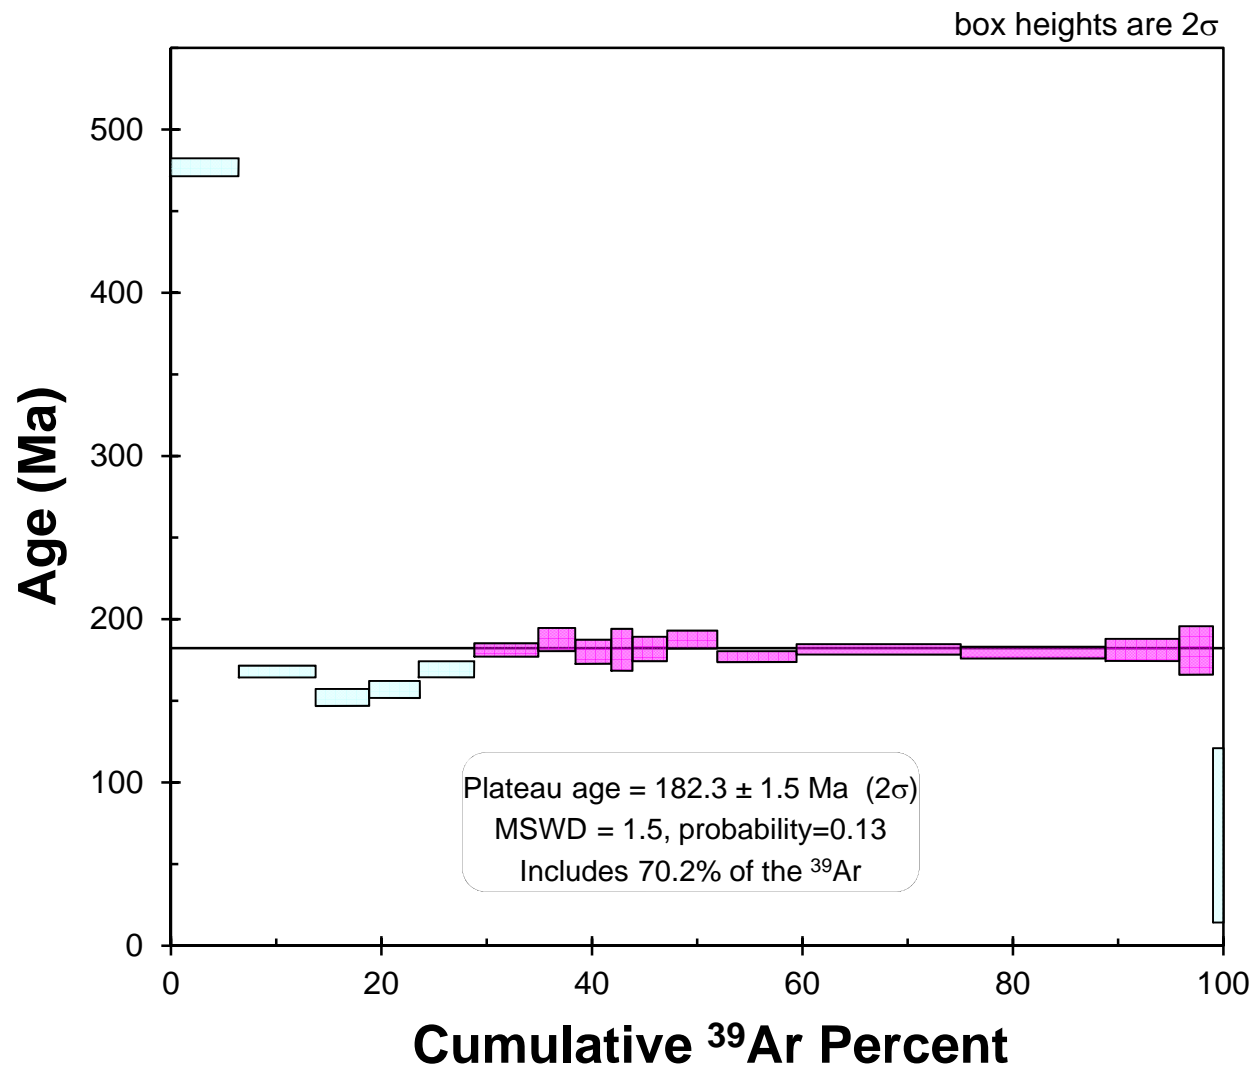

Supplement: Supplementary file 1 [file 1]
